# Supplementary material
Source: publisher figshare collection journal article supplement (https://sage.figshare.com/ndownloader/files/23700432)
Supplement: Supplementary file 1 [file 23700432]

**Appendix**

**Constructs and Measurement Items**

**Satisfaction with shopping experience during leisure travel trip**

[5-point Likert scale: very dissatisfied (1)– very satisfied (5)]

**1) Service, product and environment**

1. Payment methods the stores accept
2. Decoration of stores
3. Display and windowing of goods
4. Variety of product categories the stores carry
5. Reputation of the stores
6. Variety of brands the stores carry
7. Accessibility of the stores
8. Location of the stores
9. Ambient condition of the stores

**2) Staff service quality**

1. The stores’ employee attitude
2. The stores’ employee communication ability
3. The stores’ employee promptness
4. The stores’ employee product knowledge

**3) Merchandise value**

1. Quality of goods the stores carry
2. Authenticity of goods the stores carry
3. Price of goods the stores carry
4. Style of goods the stores carry

**4) Service differentiation**

1. Stores’ ability to provide home delivery service
2. Stores’ ability to offer unique or specialized merchandise
3. Stores’ ability to offer special deals

**Overspending on shopping during recent travel**

[5-point Likert scale: completely disagree (1) – completely agree (5)]

1. I spent more during the trip (than before or after the trip)
2. I was less concerned with the price of products during the trip
3. I was more impulsive during the trip

**Hedonic and eudaimonic experiences during leisure travel trip**

[5-point Likert scale: completely disagree (1) – completely agree (5)]

**1) Pleasure**

1. I had many laughs on this trip
2. This trip was entertaining
3. This trip made me happy

**2) Avoidance (Detachment)**

1. This trip helped me forget the problems in the world
2. This trip helped me get away from all the negativity in the news
3. This trip allowed me to live like I did not have a care in the world

**3) Personal meaning**

1. This trip helped me think about my true potentials
2. This trip helped me grow as a person
3. This trip gave me a sense of purpose in my life

**4) Self-reflection**

1. I experienced times where I could self-reflect
2. I thought about the meaning of life on this trip
3. I was able to think deeply about topics I care about

**Overall satisfaction with trip**

[5-point Likert scale: completely disagree (1) – completely agree (5)]

1. All in all, I feel that this trip has enriched my life. I’m really glad I went on this trip
2. On this trip, I accomplished the purpose of the vacation. This experience has enriched me in some ways
3. This trip was rewarding to me in many ways. I felt much better about things and myself after this trip.

**Satisfaction with leisure life**

[5-point Likert scale: very dissatisfied (1) – very satisfied (5)]

1. How satisfied are you, all in all, with your leisure life?

**Satisfaction with life overall**

[5-point Likert scale: completely disagree (1) – completely agree (5)]

1. The conditions of my life are excellent
2. I am satisfied with my life
3. So far, I have gotten the important things I want in life
4. In most ways my life is close to my ideal
5. If I could live my life over, I would change almost nothing

**Satisfaction with other life domains**

[5-point Likert scale: completely disagree (1) – completely agree (5)]

1. I am generally happy with my family situation
2. I am generally happy with my job
3. I am generally happy with my health
4. I am generally happy with the relationships I have with people such as relatives and friends

**Current Money Management Stress**

[5-point Likert scale: does not describe me at all (1) – Describes me completely (5)]

1. Because of my money situation, I feel I will never have the things I want in life
2. I am behind with my finances
3. My finances control my life
4. Whenever I feel in control of my finances, something happens that sets me back
5. I am unable to enjoy life because I obsess too much about money

**Expected future financial security**

[5-point Likert scale: does not describe me at all (1) – Describes me completely (5)]

1. I am becoming financially secure
2. I am securing my financial future
3. I will achieve the financial goals that I have set for myself
4. I have saved (or will be able to save) enough money to last me to the end of my life
5. I will be financially secure until the end of my life
